# Supplementary material for: Tuning dimensionality between 2D and 1D MOFs by lanthanide contraction and ligand-to-metal ratio
Source: Royal Society of Chemistry journal article supplement (doi:10.1039/d0nj04055j), 2021-01-01
Supplement: d0nj04055j1.pdf [file d0nj04055j1.pdf]

*Supporting Information File*

**Tuning dimensionality between 2D and 1D MOFs by lanthanide contraction and ligand-to-metal ratio.**

*Fernando González Chávez*<sup>\*[1]</sup> and *Hiram Isaac Beltrán*<sup>\*[2]</sup>

1) *Posgrado en Ciencias Naturales e Ingeniería, UAM Cuajimalpa, 05300, Ciudad de México, México;*

2) *Departamento de Ciencias Básicas, DCBI, UAM Azcapotzalco, 02200, Ciudad de México, México.*

**Table of contents**

|                                                                                                                                                                                                      |   |
|------------------------------------------------------------------------------------------------------------------------------------------------------------------------------------------------------|---|
| Figure S1. Powder X-ray diffraction patterns of PBIA-Er <sub>2D</sub> simulated, PBIA-Er <sub>2D</sub> experimental, PBIA-Tm <sub>2D</sub> experimental, and PBIA-Pr <sub>2D</sub> experimental..... | 2 |
| Figure S2. FTIR spectra of Pr, Tm and Er 2D materials. ....                                                                                                                                          | 2 |
| Figure S3. Thermograms of PBIA-Pr <sub>2D</sub> , PBIA-Tm <sub>2D</sub> , and PBIA-Er <sub>2D</sub> .....                                                                                            | 3 |
| Figure S4. H-bonding interactions between 1D chains in PBIA-Tm <sub>1D</sub> .....                                                                                                                   | 4 |
| Table S1. Selected geometrical parameters of PBIA-Tm <sub>1D</sub> .....                                                                                                                             | 5 |
| Figure S5. Simulated PXRD pattern of PBIA-Tm <sub>1D</sub> and experimental patterns of PBIA-Tm <sub>1D</sub> and PBIA-Er <sub>1D</sub> .....                                                        | 6 |
| Figure S6. FTIR spectra of PBIA-Tm <sub>1D</sub> . ....                                                                                                                                              | 6 |
| Figure S7. FTIR spectra of PBIA-Er <sub>1D</sub> .....                                                                                                                                               | 7 |

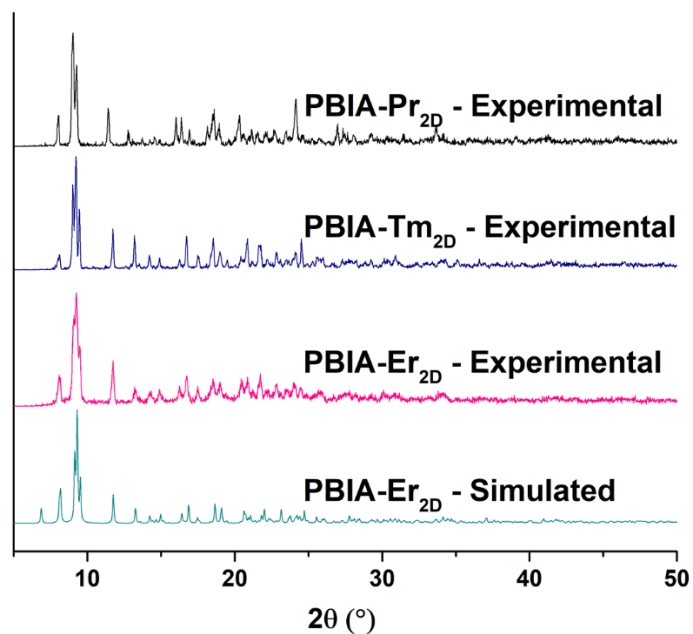

Figure S1. Powder X-ray diffraction patterns of PBIA-Er<sub>2D</sub> simulated (light blue), PBIA-Er<sub>2D</sub> experimental (pink), PBIA-Tm<sub>2D</sub> experimental (blue), and PBIA-Pr<sub>2D</sub> experimental (black). These compounds are isostructural, thus, experimental patterns are compared with the simulated powder pattern from the SCXRD of PBIA-Er<sub>2D</sub>.

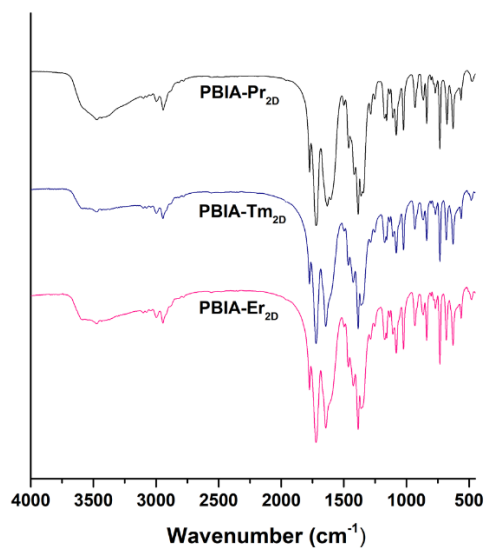

Figure S2. FTIR spectra of Pr, Tm and Er 2D materials.

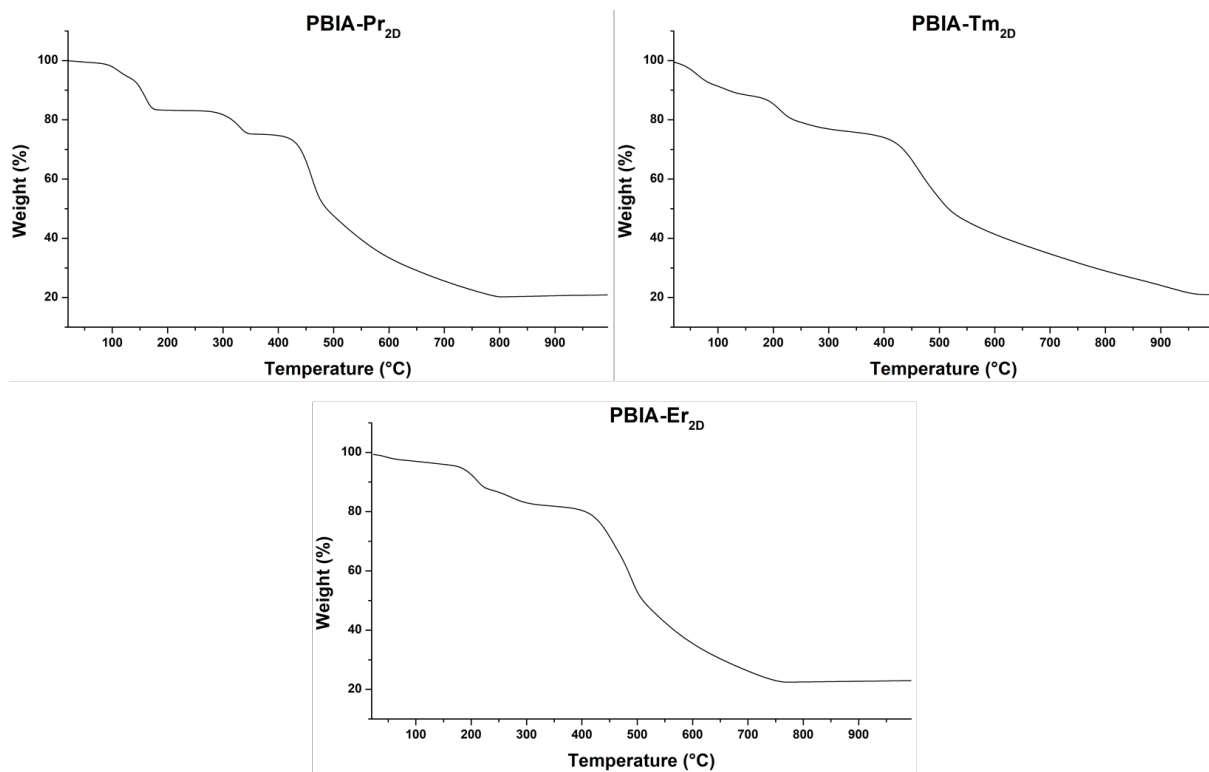

Figure S3. Thermograms of PBIA-Pr<sub>2D</sub>, PBIA-Tm<sub>2D</sub>, and PBIA-Er<sub>2D</sub>.

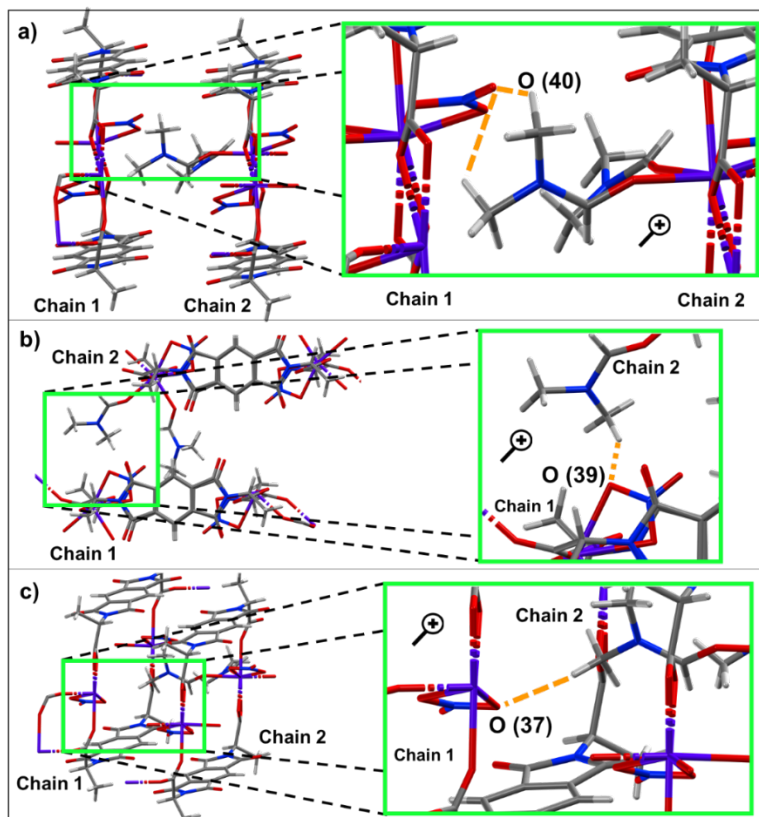

Figure S4. H-bonding interactions between 1D chains in PBIA-Tm<sub>10</sub>. Interactions between a) O(40), b) O(39), and c) O(37) from nitrate with hydrogens from DMF of the adjacent chain.

**Table S1. Selected geometrical parameters of PBIa-Tm<sub>10</sub>**

| <b>Bond distances [Å]</b>                      | <b>PBIa-Tm<sub>10</sub></b> |
|------------------------------------------------|-----------------------------|
| Tm-O(1) <sub>iso</sub>                         | 2.2584(18)                  |
| Tm-O(26) <sub>iso</sub>                        | 2.2433(17)                  |
| Tm-O(18) <sub>bidentate-chelate</sub>          | 2.354(2)                    |
| Tm-O(19) <sub>bidentate-chelate</sub>          | 2.409(2)                    |
| Tm-O(37) <sub>bidentate-nitrate</sub>          | 2.457(2)                    |
| Tm-O(39) <sub>bidentate-nitrate</sub>          | 2.375(2)                    |
| Tm-O(27) <sub>DMF1</sub>                       | 2.261(9)                    |
| Tm-O(27A) <sub>DMF1A</sub>                     | 2.230(5)                    |
| Tm-O(32) <sub>DMF2</sub>                       | 2.266(7)                    |
| Tm-O(32A) <sub>DMF2A</sub>                     | 2.285(6)                    |
| C(2)-O(26)                                     | 1.235(3)                    |
| C(2)-O(1)                                      | 1.237(3)                    |
| C(17)-O(18)                                    | 1.241(4)                    |
| C(17)-O(19)                                    | 1.233(4)                    |
| N(38)-O(37)                                    | 1.258(5)                    |
| N(38)-O(39)                                    | 1.270(4)                    |
| N(38)-O(40)                                    | 1.219(4)                    |
| C(28)-O(27)                                    | 1.155(11)                   |
| C(28A)-O(27A)                                  | 1.116(12)                   |
| C(33)-O(32)                                    | 1.243(9)                    |
| C(33A)-O(32A)                                  | 1.321(10)                   |
| <b>Bond angles [°]</b>                         |                             |
| O(26)-Tm-O(1) <sub>iso</sub>                   | 89.09(7)                    |
| O(18)-Tm-O(19) <sub>bidentate-chelate</sub>    | 53.95(8)                    |
| O(37)-Tm-O(39) <sub>bidentate-nitrate</sub>    | 52.89(10)                   |
| O(1)-C(2)-O(26) <sub>iso</sub>                 | 126.4(2)                    |
| O(18)-C(17)-O(19) <sub>bidentate-chelate</sub> | 121.7(3)                    |
| O(37)-N(38)-O(39) <sub>bidentate-nitrate</sub> | 116.8(3)                    |
| <b>Dihedral angles [°]</b>                     |                             |
| Tm-O(26)-C(2)-O(1)                             | -85.7(4)                    |
| Tm-O(1)-C(2)-O(26)                             | 14.9(6)                     |
| C(2)-O(1)-Tm-O(26)                             | 16.5460(13)                 |
| C(2)-O(26)-Tm-O(1)                             | 76.157(2)                   |
| Tm-O(19)-C(17)-O(18)                           | 3.4(4)                      |
| Tm-O(18)-C(17)-O(19)                           | -3.5(4)                     |
| Tm-O(37)-N(38)-O(1)                            | 3.32760(2)                  |
| Tm-O(39)-N(38)-O(37)                           | -3.4636(2)                  |

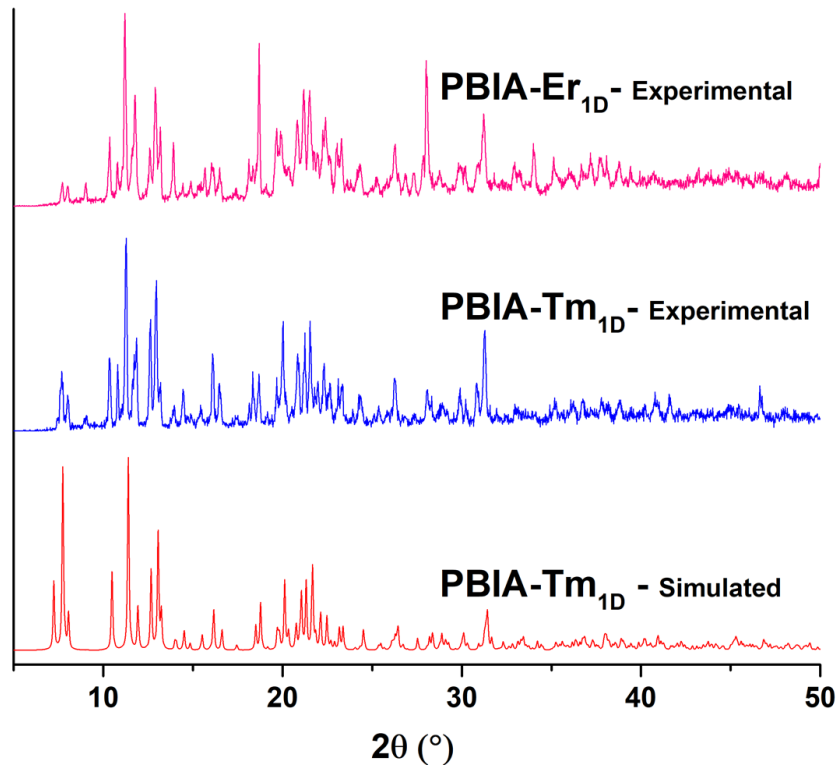

Figure S5. Simulated PXRD pattern of PBIA-Tm<sub>1D</sub> (red). Good agreement is observed among experimental patterns of PBIA-Tm<sub>1D</sub> (blue) and PBIA-Er<sub>1D</sub> (pink).

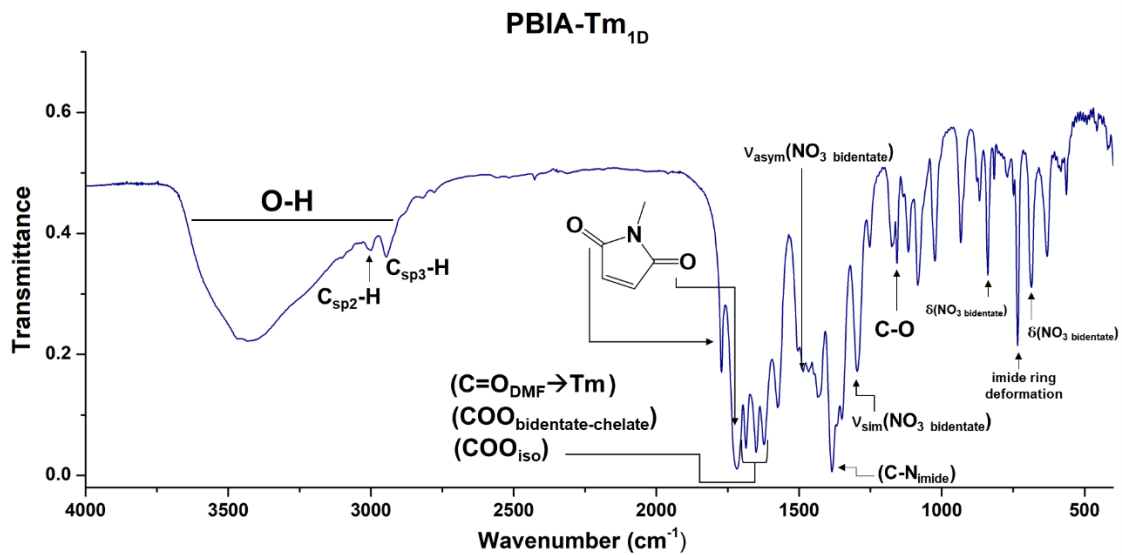

Figure S6. FTIR spectra of PBIA-Tm<sub>1D</sub>.

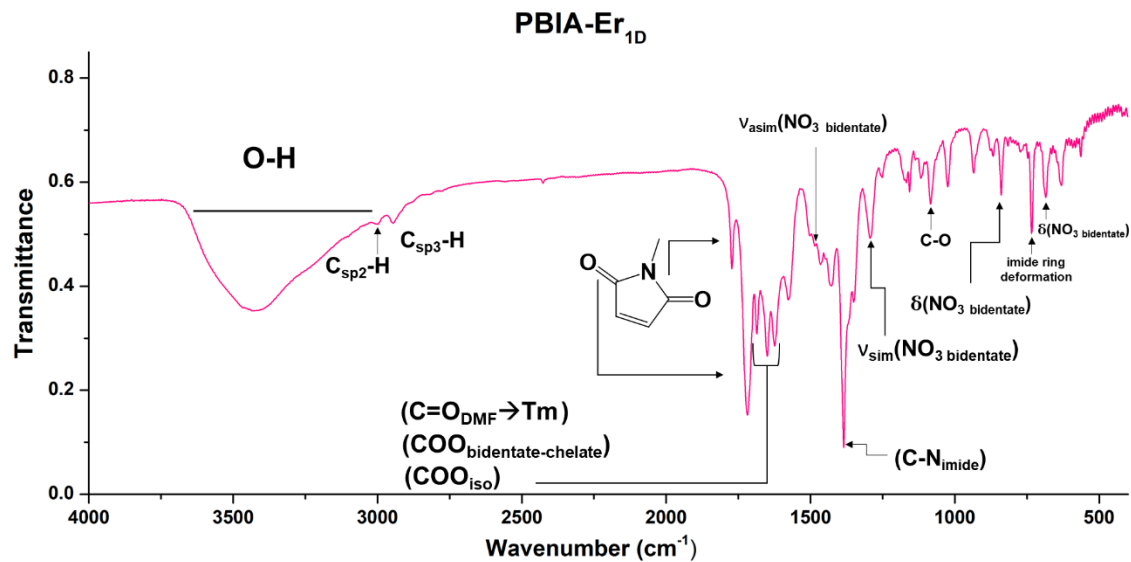

Figure S7. FTIR spectra of PBIA-Er<sub>1D</sub>.
